# Supplementary material
Source: publisher site journal article supplement (https://www.dovepress.com/article/322260)
Supplement: Supplementary file 1 [file get_supplementary_file.php]

**Supplemental Files**

**Supplemental Table 1.** The calculations and cut-off points of indices.

**Supplemental Table 2.** Treatment characteristics of patients with resectable colorectal cancer.

**Supplemental Table 3.** Association of clinical indicators with overall survival in patients with resectable colorectal cancer.

**Supplemental Table 4.** Association of clinical indicators with disease-free survival in patients with resectable colorectal cancer.

**Supplemental Figure 1.** The Kaplan–Meier overall survival curves of hs-mGPS (a), hsCRP/ALB (b), PNI (c), CEA (d), and CA19-9 (e).

**Abbreviations:** hs-mGPS, high-sensitivity modified Glasgow prognostic score; hsCRP/ALB, high-sensitivity C-reactive protein to albumin ratio; PNI, prognostic nutritional index; CEA, carcinoembryonic antigen; CA19-9, carbohydrate antigen 19-9.

**Supplemental Figure 2.** The Kaplan–Meier disease-free survival curves of hs-mGPS (a), hsCRP/ALB (b), PNI (c), CEA (d), and CA19-9 (e).

**Abbreviations:** hs-mGPS, high-sensitivity modified Glasgow prognostic score; hsCRP/ALB, high-sensitivity C-reactive protein to albumin ratio; PNI, prognostic nutritional index; CEA, carcinoembryonic antigen; CA19-9, carbohydrate antigen 19-9.

**Supplemental Figure 3.** The prognostic performances of CEA, CA19-9 combined with IINS in patients with resectable colorectal cancer.

**Abbreviations:** ROC, receiver operating characteristic; OS, overall survival; DFS, disease-free survival; AUC, area under the curve; IINS, inflammation-immunity-nutrition score; CEA, carcinoembryonic antigen; CA19-9, carbohydrate antigen 19-9.

**Supplemental Table 1. The calculations and cut-off points of indices.**

| **Indices** | **Calculations** | **Cut-offa** |
| --- | --- | --- |
| CEA(ng/ml) |  | 4.50 |
| CA19-9 (kU/L) |  | 12.00 |
| hsCRP/ALB | hsCRP/ALB | 0.26 |
| PNI | ALB + LYM count × 5 | 47.25 |

**Abbreviations:** CEA, carcinoembryonic antigen; CA19-9, carbohydrate antigen 19-9; hsCRP/ALB, high sensitivity C-reactive protein to albumin ratio; PNI, prognostic nutritional index; LYM, lymphocyte.

**Notes:** a The cut-offs were derived from receiver operating characteristic curves based on the association with the patients’ overall survival.

**Supplemental Table 2. Treatment characteristics of patients with resectable colorectal cancer.**

| Characteristics | Total (n=719) | Colon cancer (n=411) | Rectal cancer (n=308) | *P* valuea |
| --- | --- | --- | --- | --- |
| Preoperative chemotherapy, n (%) |  |  |  | 0.0140* |
| No | 678 (94.30) | 380 (92.46) | 298 (96.75) |  |
| Yes | 41 (5.70) | 31 (7.54) | 10 (3.25) |  |
| Preoperative radiotherapy, n (%) |  |  |  | 0.0064** |
| No | 691 (96.11) | 388 (94.40) | 303 (98.38) |  |
| Yes | 28 (3.89) | 23 (5.60) | 5 (1.62) |  |
| Postoperative chemotherapy, n (%) |  |  |  | 0.3282 |
| No | 284 (39.50) | 156 (37.96) | 128 (41.56) |  |
| Yes | 435 (60.50) | 255 (62.05) | 180 (58.44) |  |
| Postoperative radiotherapy, n (%) |  |  |  | 0.0014** |
| No | 659 (91.66) | 365 (88.81) | 294 (95.45) |  |
| Yes | 60 (8.34) | 46 (11.19) | 14 (4.55) |  |

**Notes:** a *P* values were derived from χ2 tests.**P* < 0.05; ***P* < 0.01.

**Supplemental Table 3.** **Association of clinical indicators with overall survival in patients with resectable colorectal cancer.**

|  |  | **Univariate** | |  | **Multivariatea** | |
| --- | --- | --- | --- | --- | --- | --- |
| **Characteristics** |  | **HR (95% CI)** | ***P* value** |  | **HR (95% CI)** | ***P* value** |
| Age, y | Per year increase | 1.001 (0.987-1.015) | 0.9076 |  |  |  |
| Sex | Male | 1.000 |  |  |  |  |
|  | Female | 1.037 (0.739-1.453) | 0.8351 |  |  |  |
| Tumor location | Colon | 1.000 |  |  |  |  |
|  | Rectum | 1.152 (0.824-1.610) | 0.4087 |  |  |  |
| Histological type | Non-mucinous adenocarcinoma | 1.000 |  |  |  |  |
|  | Mucinous adenocarcinoma | 1.131 (0.529-2.421) | 0.7503 |  |  |  |
|  | Mixed adenocarcinoma | 0.310 (0.043-2.221) | 0.2439 |  |  |  |
| Pathological stage | Per stage increase | 2.678 (2.163-3.316) | <0.0001*** |  | 2.551 (2.052-3.171) | <0.0001*** |
| Differentiation | Low | 1.000 |  |  | 1.000 |  |
|  | Medium | 0.674 (0.428-1.059) | 0.0870 |  | 0.824 (0.522-1.302) | 0.4076 |
|  | High | 0.358 (0.124-1.031) | 0.0571 |  | 0.597 (0.204-1.748) | 0.3466 |
|  | Unknown | 0.733 (0.416-1.291) | 0.2821 |  | 0.969 (0.548-1.713) | 0.9137 |
| Circumferential margin | No | 1.000 |  |  |  |  |
|  | Yes | 2.297 (0.568-9.281) | 0.2433 |  |  |  |
| Vascular tumor thrombus | No | 1.000 |  |  |  |  |
|  | Yes | 1.216 (0.848-1.744) | 0.2864 |  |  |  |
| Nerve invasion | No | 1.000 |  |  | 1.000 |  |
|  | Yes | 1.706 (1.212-2.402) | 0.0022** |  | 1.471 (1.040-2.081) | 0.0293* |
| *KRAS* mutationb | No | 1.000 |  |  |  |  |
|  | Yes | 0.860 (0.522-1.417) | 0.5538 |  |  |  |
| Preoperative chemotherapy | No | 1.000 |  |  |  |  |
|  | Yes | 1.683 (0.931-3.042) | 0.085 |  |  |  |
| Preoperative radiotherapy | No | 1.000 |  |  |  |  |
|  | Yes | 1.081 (0.477-2.449) | 0.8528 |  |  |  |
| Postoperative chemotherapy | No | 1.000 |  |  |  |  |
|  | Yes | 0.835 (0.597-1.170) | 0.2952 |  |  |  |
| Postoperative radiotherapy | No | 1.000 |  |  |  |  |
|  | Yes | 1.063 (0.588-1.922) | 0.8395 |  |  |  |
| IINS | ≤2 | 1.000 |  |  | 1.000 |  |
|  | >2 | 3.051 (2.172-4.286) | <0.0001*** |  | 3.106 (2.202-4.380) | <0.0001*** |

**Abbreviations:** HR, hazard ratio; CI, confidence interval; *KRAS*, Kirsten rat sarcoma viral oncogene homolog; IINS: inflammation-immunity-nutrition score.

**Notes:** a Pathological stage, differentiation, nerve invasion, and IINS were included for multivariate Cox regression analysis; b n=513.

**P* < 0.05; ***P* < 0.01; ****P* < 0.001.

**Supplemental Table 4.** **Association of clinical indicators with disease-free survival in patients with resectable colorectal cancer.**

|  |  | **Univariate** | |  | **Multivariatea** | |
| --- | --- | --- | --- | --- | --- | --- |
| **Characteristics** |  | **HR (95% CI)** | ***P* value** |  | **HR (95% CI)** | ***P* value** |
| Age, y | Per year increase | 0.997 (0.986-1.009) | 0.6404 |  |  |  |
| Sex | Male | 1.000 |  |  |  |  |
|  | Female | 0.933 (0.711-1.225) | 0.6198 |  |  |  |
| Tumor location | Colon | 1.000 |  |  |  |  |
|  | Rectum | 1.153 (0.882-1.506) | 0.2970 |  |  |  |
| Histological type | Non-mucinous adenocarcinoma | 1.000 |  |  |  |  |
|  | Mucinous adenocarcinoma | 0.891 (0.457-1.737) | 0.7342 |  |  |  |
|  | Mixed adenocarcinoma | 0.388 (0.096-1.560) | 0.1822 |  |  |  |
| Pathological stage | Per stage increase | 3.664 (3.030-4.430) | <0.0001*** |  | 3.580 (2.949- 4.345) | <0.0001*** |
| Differentiation | Low | 1.000 |  |  | 1.000 |  |
|  | Medium | 0.672 (0.467-0.967) | 0.0324* |  | 0.858 (0.589- 1.249) | 0.4233 |
|  | High | 0.619 (0.316-1.214) | 0.1632 |  | 0.825 (0.411- 1.653) | 0.5870 |
|  | Unknown | 0.711 (0.449-1.124) | 0.1444 |  | 0.989 (0.616- 1.587) | 0.9636 |
| Circumferential margin | No | 1.000 |  |  |  |  |
|  | Yes | 2.261 (0.723-7.069) | 0.1607 |  |  |  |
| Vascular tumor thrombus | No | 1.000 |  |  | 1.000 |  |
|  | Yes | 1.647 (1.249-2.172) | 0.0004*** |  | 1.142 (0.837- 1.558) | 0.4017 |
| Nerve invasion | No | 1.000 |  |  | 1.000 |  |
|  | Yes | 1.674 (1.272-2.204) | 0.0002*** |  | 1.498 (1.100- 2.039) | 0.0103* |
| *KRAS* mutationb | No | 1.000 |  |  |  |  |
|  | Yes | 1.051 (0.735-1.501) | 0.7859 |  |  |  |
| Preoperative chemotherapy | No | 1.000 |  |  |  |  |
|  | Yes | 1.312 (0.776-2.216) | 0.3108 |  |  |  |
| Preoperative radiotherapy | No | 1.000 |  |  |  |  |
|  | Yes | 0.772 (0.363-1.639) | 0.4543 |  |  |  |
| Postoperative chemotherapy | No | 1.000 |  |  | 1.000 |  |
|  | Yes | 1.350 (1.019-1.787) | 0.0363* |  | 0.899 (0.674- 1.200) | 0.4715 |
| Postoperative radiotherapy | No | 1.000 |  |  |  |  |
|  | Yes | 1.508 (0.986-2.305) | 0.0578 |  |  |  |
| IINS | ≤2 | 1.000 |  |  | 1.000 |  |
|  | >2 | 2.088 (1.600- 2.725) | <0.0001*** |  | 2.105 (1.604-2.764) | <0.0001*** |

**Abbreviations:** HR, hazard ratio; CI, confidence interval; *KRAS*, Kirsten rat sarcoma viral oncogene homolog; IINS, inflammation-immunity-nutrition score.

**Notes:** a Pathological stage, differentiation, vascular tumor thrombus, nerve invasion, postoperative chemotherapy, and IINS were included for multivariate Cox regression analysis; b n=513.

**P* < 0.05; ****P* < 0.001.


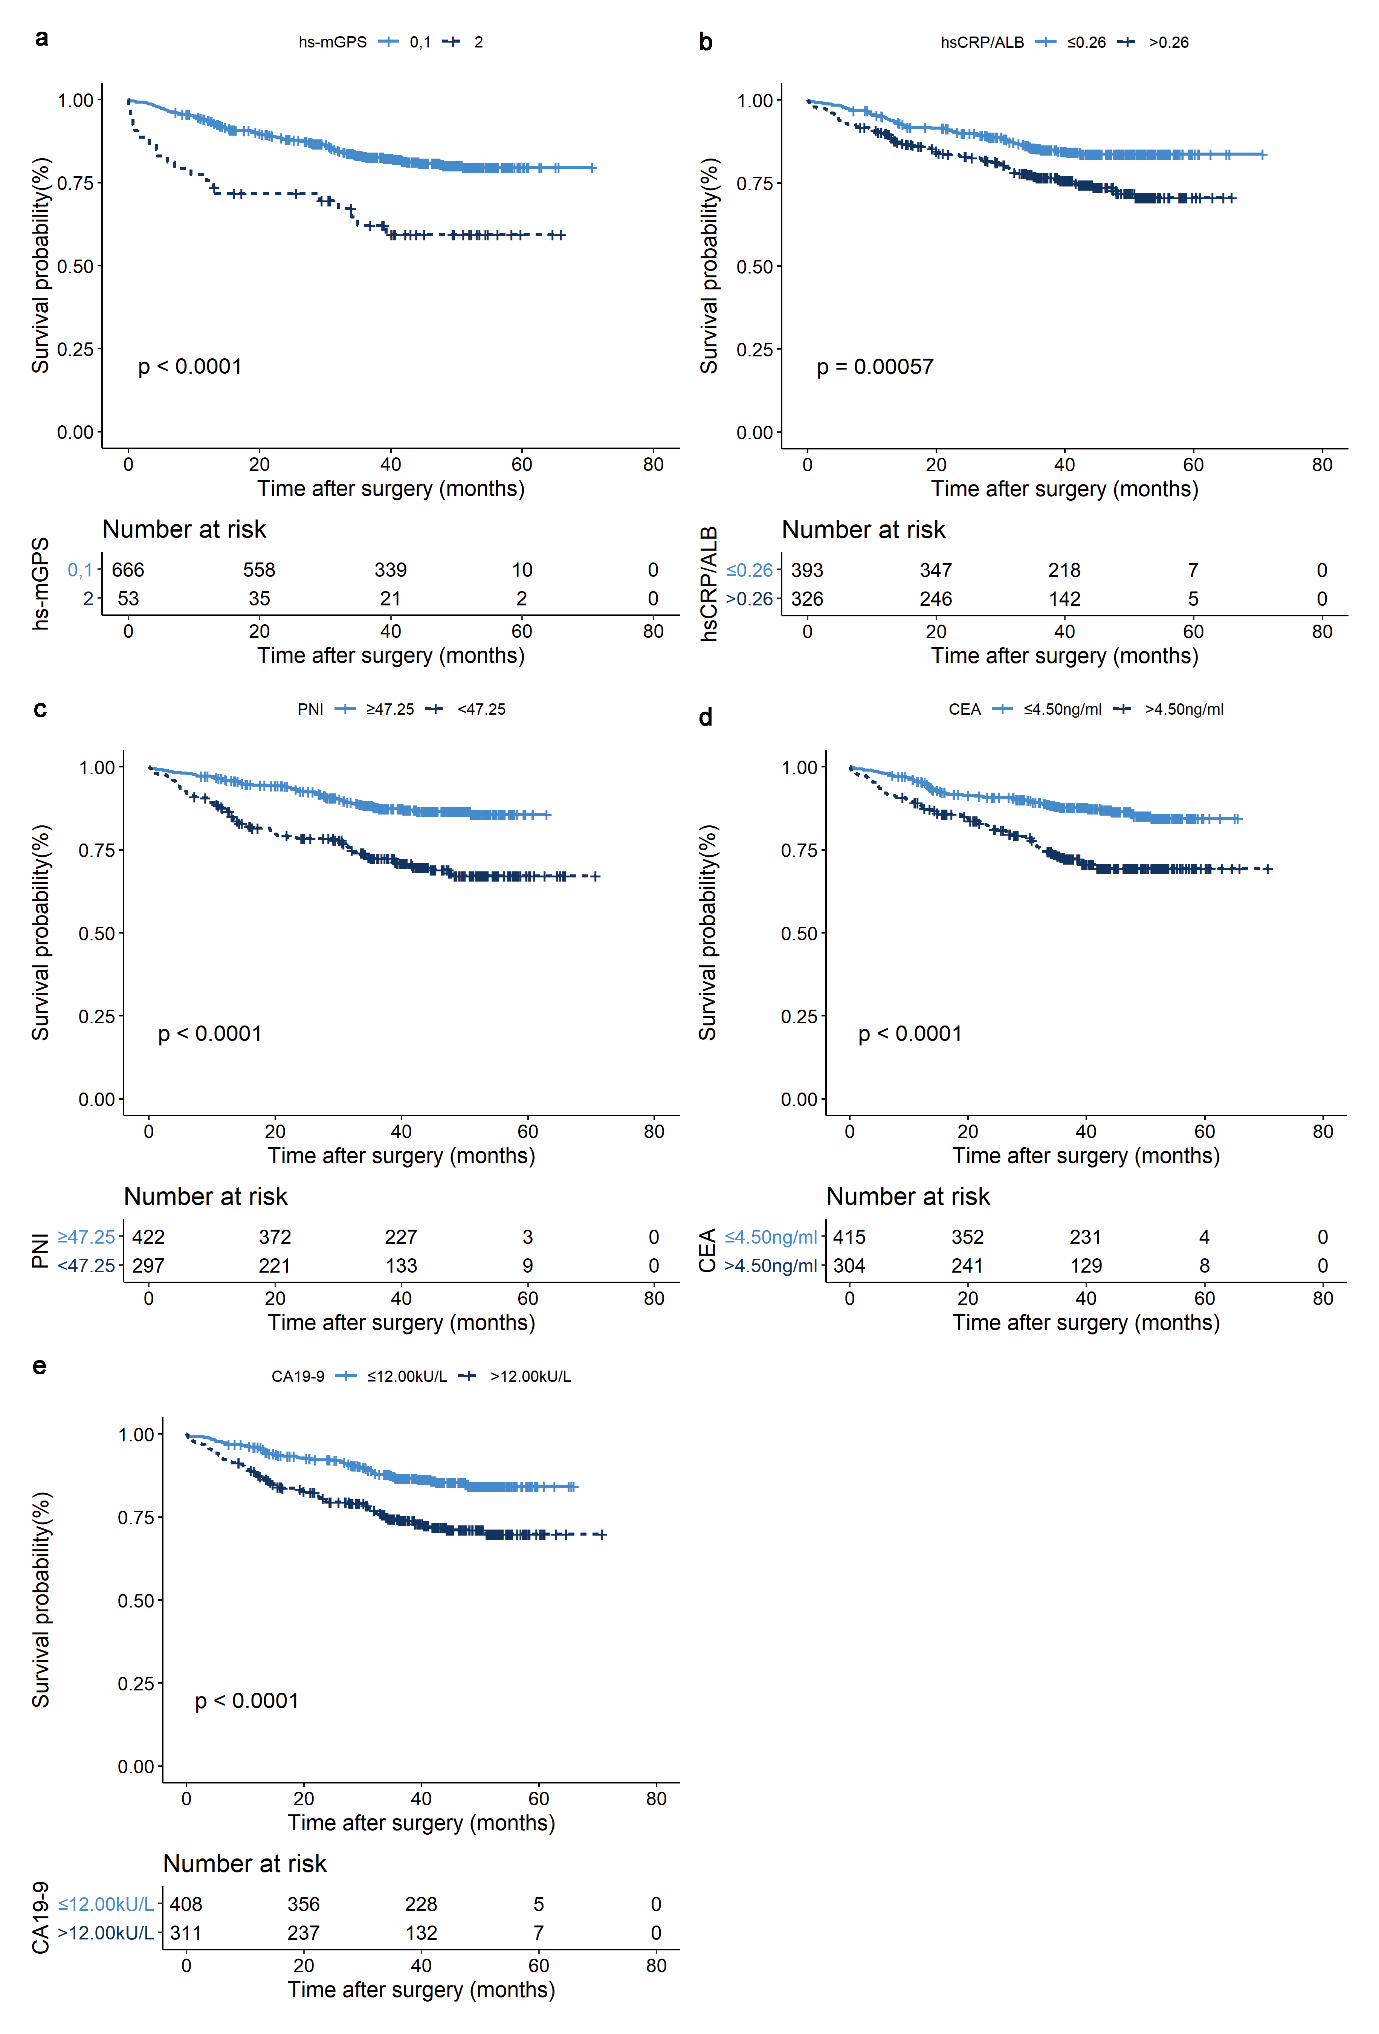


**Supplemental Figure 1. The Kaplan–Meier overall survival curves of hs-mGPS (a), hsCRP/ALB (b), PNI (c), CEA (d), and CA19-9 (e).**

**Abbreviations:** hs-mGPS, high-sensitivity modified Glasgow prognostic score; hsCRP/ALB, high-sensitivity C-reactive protein to albumin ratio; PNI, prognostic nutritional index; CEA, carcinoembryonic antigen; CA19-9, carbohydrate antigen 19-9.


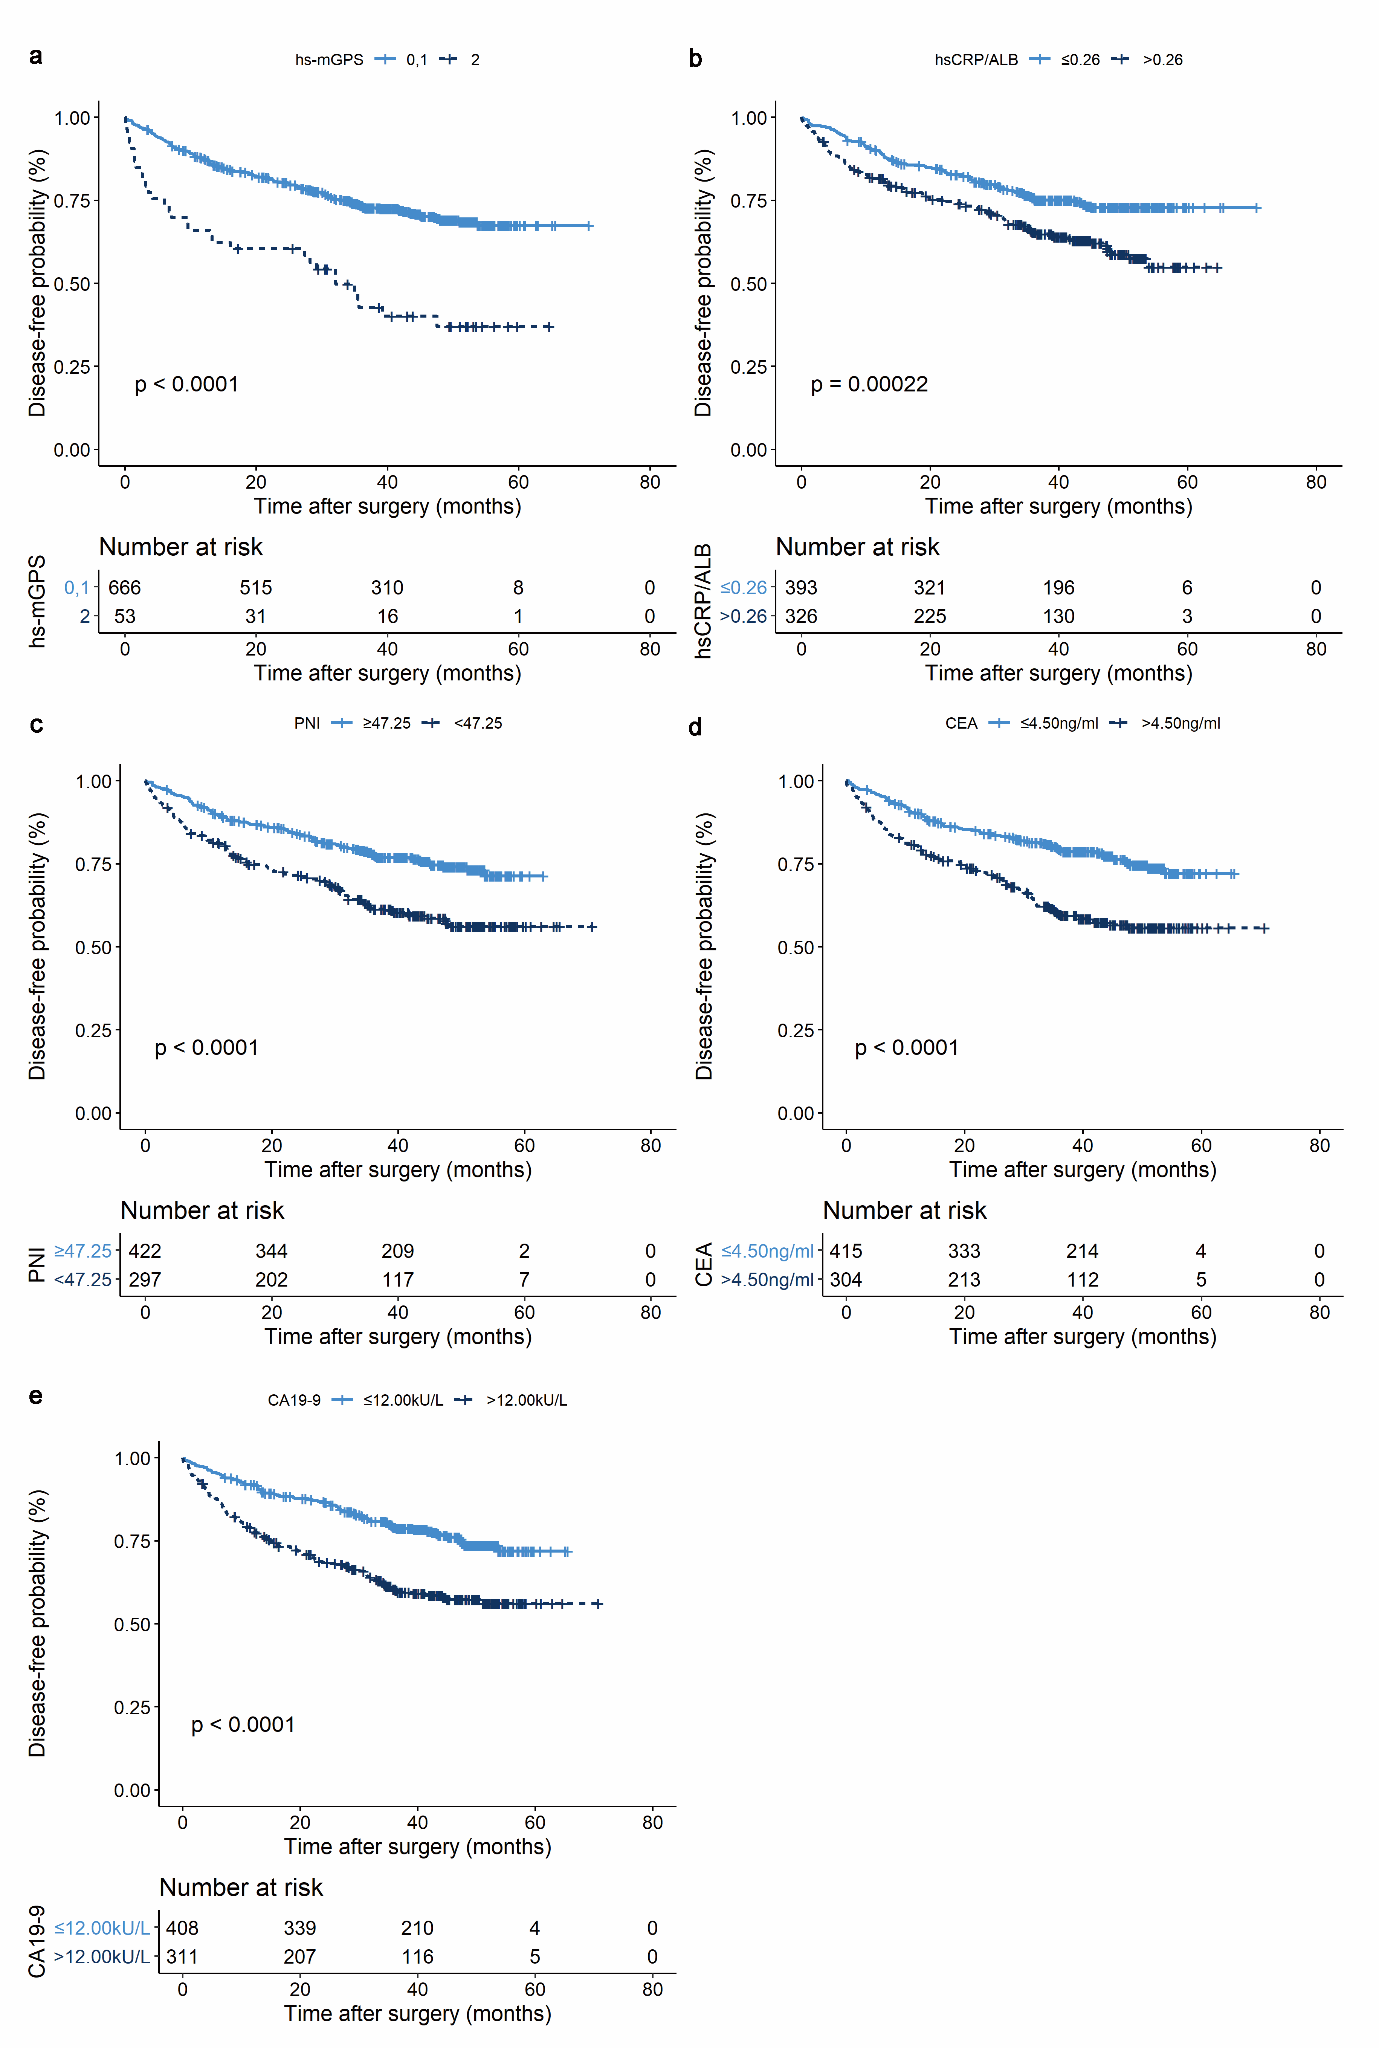


**Supplemental Figure 2.** **The Kaplan–Meier disease-free survival curves of hs-mGPS (a), hsCRP/ALB (b), PNI (c), CEA (d), and CA19-9 (e).**

**Abbreviations:** hs-mGPS, high-sensitivity modified Glasgow prognostic score; hsCRP/ALB, high-sensitivity C-reactive protein to albumin ratio; PNI, prognostic nutritional index; CEA, carcinoembryonic antigen; CA19-9, carbohydrate antigen 19-9.


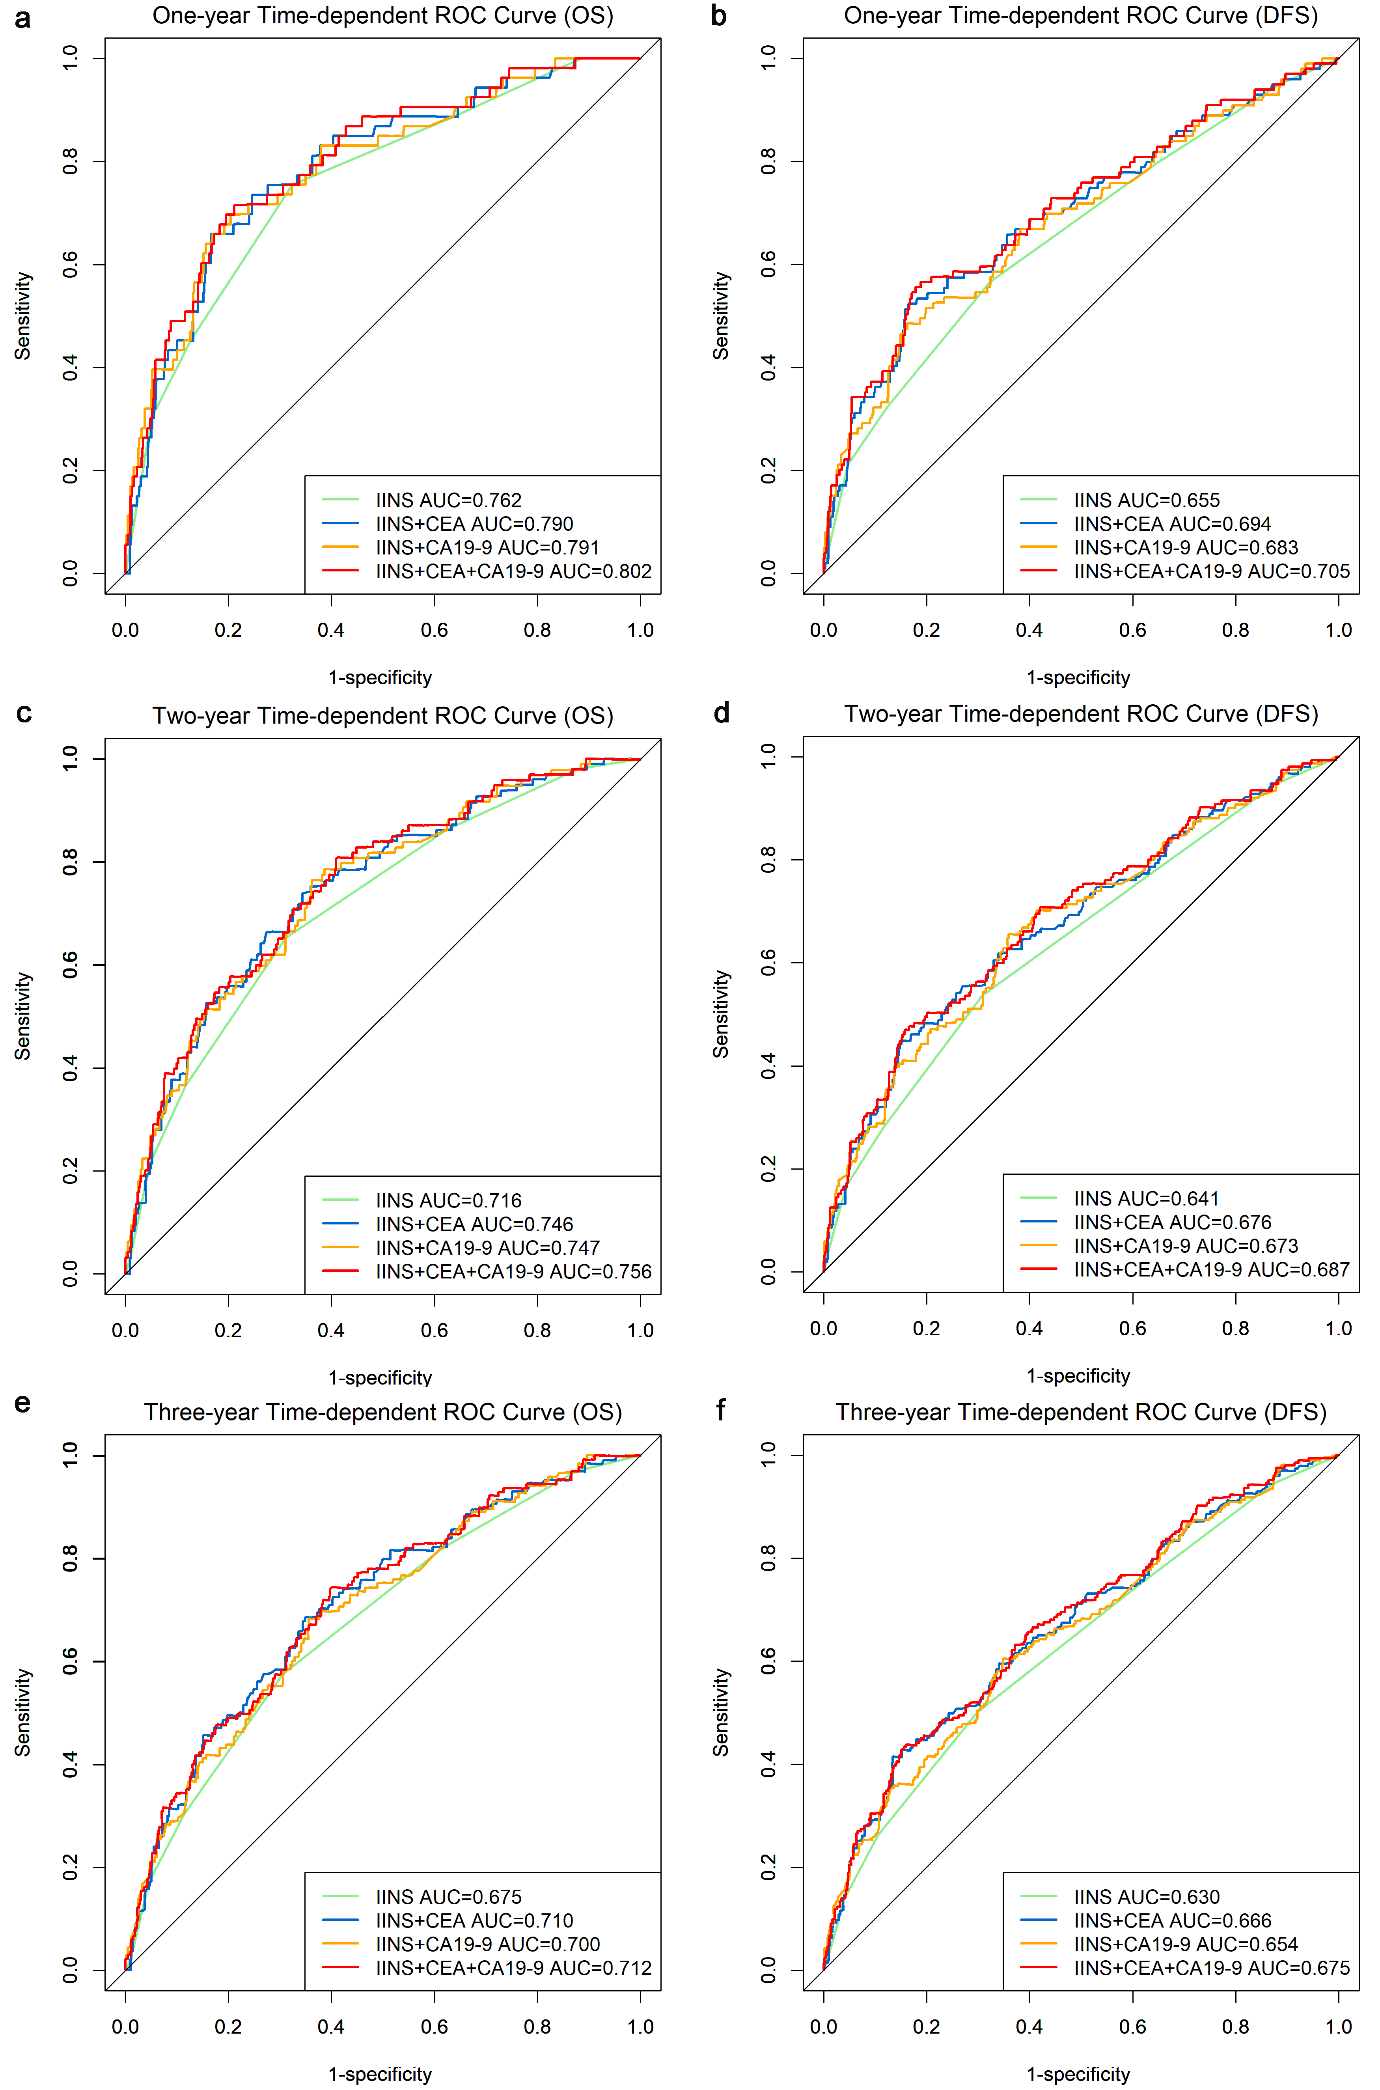


**Supplemental Figure 3. The prognostic performances of CEA, CA19-9 combined with IINS in patients with resectable colorectal cancer.**

**Abbreviations:** ROC, receiver operating characteristic; OS, overall survival; DFS, disease-free survival; AUC, area under the curve; IINS, inflammation-immunity-nutrition score; CEA, carcinoembryonic antigen; CA19-9, carbohydrate antigen 19-9.
